# Supplementary material for: Reduced MIP-1β as a Trait Marker and Reduced IL-7 and IL-12 as State Markers of Anorexia Nervosa
Source: MDPI journal article supplement (doi:10.3390/jpm11080814), 2021-08-20
Supplement: s1 [file s1]

Table S1. Metrics of inflammatory markers in the whole sample.

| Inflammatory marker | Undetectable Below fit<br>curve<br>(n (%)) | Low detection limit<br>(pg/ml) | High detection limit<br>(pg/ml) |
|---------------------|--------------------------------------------|--------------------------------|---------------------------------|
| Eotaxin             | 0 (0%)                                     | 2.29                           | 1880                            |
| Eotaxin-3           | 0 (0%)                                     | 0.692                          | 6240                            |
| GM-CSF              | 31 (22%)                                   | 0.116                          | 1260                            |
| IFN- $\gamma$       | 0 (0%)                                     | 0.215                          | 1500                            |
| IL-1 $\alpha$       | 79 (56%)                                   | 0.920                          | 454                             |
| IL-1 $\beta$        | 110 (77%)                                  | 0.064                          | 610                             |
| IL-2                | 8 (6%)                                     | 0.042                          | 1440                            |
| IL-4                | 46 (32%)                                   | 0.015                          | 218                             |
| IL-5                | 112 (79%)                                  | 0.190                          | 857                             |
| IL-6                | 0 (0%)                                     | 0.061                          | 742                             |
| IL-7                | 0 (0%)                                     | 0.116                          | 830                             |
| IL-8                | 0 (0%)                                     | 0.032                          | 612                             |
| IL-10               | 0 (0%)                                     | 0.020                          | 378                             |
| IL-12/IL-23p40      | 0 (0%)                                     | 0.250                          | 3650                            |
| IL-12p70            | 17 (12%)                                   | 0.066                          | 549                             |
| IL-13               | 25 (18%)                                   | 0.721                          | 529                             |
| IL-15               | 0 (0%)                                     | 0.142                          | 941                             |
| IL-16               | 0 (0%)                                     | 0.212                          | 2910                            |
| IL-17 $\alpha$      | 0 (0%)                                     | 0.256                          | 6240                            |
| IL-21               | 102 (72%)                                  | 0.681                          | 1180                            |
| IL-22               | 6 (4%)                                     | 0.216                          | 542                             |
| IL-23               | 131 (92%)                                  | 0.455                          | 5540                            |
| IL-27               | 0 (0%)                                     | 12.9                           | 18200                           |
| IL-31               | 46 (32%)                                   | 0.070                          | 964                             |
| IP-10               | 0 (0%)                                     | 0.169                          | 2360                            |
| MCP-1               | 0 (0%)                                     | 0.035                          | 562                             |
| MCP-4               | 0 (0%)                                     | 4.24                           | 724                             |
| MDC                 | 0 (0%)                                     | 3.34                           | 11800                           |
| MIP- 3 $\alpha$     | 2 (1%)                                     | 0.277                          | 566                             |
| MIP-1 $\alpha$      | 8 (6%)                                     | 3.54                           | 11800                           |
| MIP-1 $\beta$       | 0 (0%)                                     | 0.803                          | 1270                            |
| TARC                | 0 (0%)                                     | 0.310                          | 1800                            |
| TNF- $\alpha$       | 0 (0%)                                     | 0.118                          | 367                             |

|              |          |       |      |
|--------------|----------|-------|------|
| TNF- $\beta$ | 17 (12%) | 0.080 | 711  |
| VEGF         | 0 (0%)   | 0.326 | 1350 |

---

Abbreviations: IFN = interferon; IL = interleukin; IP = interferon  $\gamma$ -induced protein; MCP = monocyte chemoattractant protein; MDC = macrophage-derived chemokine; MIP = macrophage inflammatory protein; TARC = thymus and activation-regulated chemokine; TNF = tumor necrosis factor; VEGF = vascular endothelial growth factor.
